# Supplementary material
Source: PubMed Central journal article supplement (PMC1664982)
Supplement: TJP366appendixa1.pdf [file TJP366appendixa1.pdf]

## Supplementary Data

**Table S1: Ratio SSq double exp fit / single exp fit**

| <b>Voltage</b> | <b>WT</b>       | <b>R528Q</b>    |
|----------------|-----------------|-----------------|
| -80 mV         | $0.43 \pm 0.03$ | $0.25 \pm 0.04$ |
| -120 mV        | $0.97 \pm 0.02$ | $0.87 \pm 0.01$ |

Summary of the ratio of the SSq for a bi-exponential fit compared to a single exponential fit to deactivation current traces for both WT and R528Q HERG channel. A double exponential fit will always provide a smaller deviation from the raw data, however this difference is clearly very small for WT at -120 mV. It is therefore reasonable to infer that a single exponential provides a good fit to the data for WT at -120 mV and a reasonable fit for R528Q at -120 mV. However, at -80 mV a bi-exponential fit is clearly much better for both WT and R528Q, as indicated by the much lower ratio values.
